# Supplementary material
Source: publisher figshare collection journal article supplement (https://rs.figshare.com/ndownloader/files/12297287)
Supplement: Supplementary file 1 [file 12297287]

## Sheet: colony_departures2
ID	TripID	long_depart	lat_depart	time_depart	discol_depart	trip_duration	total_trips
1	1.01	144.699	-38.2814	2015-01-09 15:18:30	0.576137	76024	9
1	1.02	144.699	-38.2861	2015-01-11 09:25:16	1.09568	8051	9
1	1.03	144.706	-38.2787	2015-01-11 19:08:43	0.73171	3564	9
1	1.04	144.704	-38.2751	2015-01-12 04:01:15	0.534628	103544	9
1	1.05	144.704	-38.2809	2015-01-14 07:22:32	0.724464	101386	9
1	1.06	144.697	-38.2953	2015-01-16 06:45:38	2.11534	96616	9
1	1.07	144.694	-38.2816	2015-01-18 16:47:44	0.696692	8753	9
1	1.08	144.702	-38.2803	2015-01-19 06:52:51	0.554685	13139	9
1	1.09	144.699	-38.2808	2015-01-19 13:58:14	0.501198	180586	9
2	2.01	144.703	-38.2727	2015-01-10 07:26:45	0.60087	33122	8
2	2.02	144.704	-38.2732	2015-01-11 06:58:04	0.617965	39004	8
2	2.03	144.707	-38.2683	2015-01-12 06:53:56	1.15888	31935	8
2	2.07	144.701	-38.2694	2015-01-13 12:11:55	0.817515	96900	8
2	2.08	144.711	-38.2663	2015-01-15 08:34:47	1.56756	131398	8
2	2.09	144.704	-38.2662	2015-01-17 05:44:19	1.21892	175518	8
2	2.1	144.678	-38.2835	2015-01-19 06:34:22	1.92148	32337	8
2	2.11	144.692	-38.286	2015-01-19 16:25:50	1.2182	138191	8
3	3.01	144.706	-38.2807	2015-01-09 17:05:05	0.801689	12532	19
3	3.02	144.704	-38.2828	2015-01-10 09:28:28	0.86803	80960	19
3	3.03	144.681	-38.289	2015-01-11 11:40:16	2.07646	14229	19
3	3.04	144.694	-38.2864	2015-01-12 09:14:04	1.17699	88859	19
3	3.05	144.703	-38.279	2015-01-13 10:07:32	0.537652	23199	19
3	3.06	144.691	-38.278	2015-01-13 17:38:22	0.661287	9687	19
3	3.07	144.722	-38.2844	2015-01-14 07:13:23	2.24613	24798	19
3	3.08	144.717	-38.2911	2015-01-15 07:57:55	2.32104	12398	19
3	3.09	144.702	-38.2804	2015-01-15 16:17:02	0.552488	17238	19
3	3.1	144.702	-38.2838	2015-01-16 08:26:23	0.887705	203780	19
3	3.11	144.703	-38.2846	2015-01-18 17:49:22	1.0147	9425	19
3	3.13	144.703	-38.279	2015-01-19 06:20:01	0.501502	9312	19
3	3.14	144.689	-38.2917	2015-01-19 09:07:47	1.90644	36992	19
3	3.15	144.702	-38.2726	2015-01-19 19:32:36	0.533272	58991	19
3	3.16	144.711	-38.2849	2015-01-20 12:24:47	1.49411	25949	19
3	3.17	144.689	-38.2895	2015-01-20 20:14:08	1.66187	39300	19
3	3.18	144.713	-38.2815	2015-01-21 07:30:23	1.44892	6349	19
3	3.19	144.706	-38.2792	2015-01-21 10:07:39	0.727364	79250	19
3	3.2	144.718	-38.2845	2015-01-22 09:08:20	1.92913	27715	19
4	4.01	144.7	-38.2822	2015-01-09 13:05:07	0.676444	17755	11
4	4.02	144.696	-38.2828	2015-01-09 18:14:46	0.752531	89202	11
4	4.03	144.693	-38.2795	2015-01-10 19:16:05	0.579115	72625	11
4	4.05	144.705	-38.2782	2015-01-11 19:06:29	0.599287	3664	11
4	4.06	144.692	-38.2922	2015-01-12 06:37:37	1.85952	36162	11
4	4.08	144.685	-38.2962	2015-01-13 13:53:30	2.50767	19864	11
4	4.09	144.696	-38.2829	2015-01-13 21:04:55	0.766581	73340	11
4	4.11	144.698	-38.2883	2015-01-15 15:15:45	1.34006	247166	11
4	4.12	144.694	-38.2803	2015-01-18 16:55:42	0.57076	11130	11
4	4.13	144.69	-38.2861	2015-01-19 06:24:54	1.30525	135147	11
4	4.14	144.67	-38.2881	2015-01-20 20:48:56	2.79895	122091	11
5	5.01	144.7	-38.2856	2015-01-09 14:17:19	1.04785	66167	8
5	5.02	144.694	-38.2805	2015-01-10 20:20:01	0.618574	59596	8
5	5.03	144.694	-38.2802	2015-01-12 11:29:40	0.568965	31495	8
5	5.04	144.691	-38.2945	2015-01-13 08:38:53	2.14164	40436	8
5	5.05	144.692	-38.2867	2015-01-14 11:57:21	1.28976	72348	8
5	5.06	144.693	-38.2831	2015-01-15 13:15:48	0.886292	20127	8
5	5.07	144.694	-38.2916	2015-01-16 10:34:58	1.74019	32910	8
5	5.08	144.692	-38.2912	2015-01-17 11:24:15	1.73886	181509	8
6	6.01	144.697	-38.2875	2015-01-09 11:12:35	1.24464	16721	14
6	6.03	144.693	-38.2837	2015-01-10 09:55:56	0.953384	38884	14
6	6.04	144.697	-38.2893	2015-01-11 05:32:36	1.45356	28842	14
6	6.05	144.698	-38.2814	2015-01-11 13:53:05	0.573294	10126	14
6	6.06	144.691	-38.2901	2015-01-12 07:17:01	1.66002	29622	14
6	6.07	144.692	-38.2895	2015-01-12 16:10:16	1.55676	98919	14
6	6.08	144.697	-38.2841	2015-01-14 09:09:10	0.884556	43934	14
6	6.09	144.695	-38.284	2015-01-15 05:51:39	0.906057	37744	14
6	6.1	144.691	-38.2832	2015-01-15 16:53:30	1.0036	13663	14
6	6.12	144.691	-38.2928	2015-01-16 15:02:39	1.95043	58036	14
6	6.13	144.693	-38.2792	2015-01-17 11:06:42	0.57764	80650	14
6	6.14	144.694	-38.2866	2015-01-18 10:18:37	1.21017	194751	14
6	6.15	144.693	-38.2781	2015-01-20 16:49:16	0.509868	53422	14
6	6.16	144.696	-38.287	2015-01-21 11:42:30	1.21903	69513	14
7	7.02	144.709	-38.2922	2015-01-10 09:20:25	2.01306	14944	18
7	7.03	144.71	-38.2912	2015-01-10 18:05:34	1.94685	10229	18
7	7.04	144.708	-38.2854	2015-01-11 16:30:06	1.34942	16511	18
7	7.05	144.699	-38.2836	2015-01-12 10:20:50	0.822362	37309	18
7	7.06	144.701	-38.2824	2015-01-13 13:40:04	0.702268	19903	18
7	7.07	144.708	-38.2829	2015-01-14 07:50:55	1.13667	39537	18
7	7.08	144.711	-38.2804	2015-01-15 10:46:59	1.19715	10376	18
7	7.09	144.7	-38.2859	2015-01-15 17:50:50	1.08054	11481	18
7	7.1	144.702	-38.2805	2015-01-16 17:21:33	0.562767	11925	18
7	7.11	144.705	-38.2857	2015-01-17 17:57:55	1.21342	11084	18
7	7.12	144.707	-38.2866	2015-01-18 09:42:15	1.40023	12013	18
7	7.13	144.699	-38.2815	2015-01-18 18:47:10	0.587038	7819	18
7	7.16	144.705	-38.2858	2015-01-19 07:31:40	1.2177	11675	18
7	7.17	144.702	-38.2817	2015-01-19 15:02:44	0.699103	21449	18
7	7.18	144.707	-38.2821	2015-01-20 12:30:26	0.975713	29634	18
7	7.19	144.711	-38.2869	2015-01-21 11:03:12	1.61035	34779	18
7	7.2	144.704	-38.2846	2015-01-22 09:13:13	1.06073	27205	18
7	7.21	144.699	-38.2828	2015-01-22 18:28:14	0.72271	8480	18
8	8.01	144.692	-38.2869	2015-01-09 12:25:50	1.30438	116306	6
8	8.02	144.685	-38.2857	2015-01-11 10:39:14	1.54011	10244	6
8	8.05	144.676	-38.2927	2015-01-20 05:39:11	2.69514	15068	6
8	8.06	144.691	-38.2817	2015-01-20 16:48:59	0.897935	11825	6
8	8.07	144.692	-38.287	2015-01-20 20:29:45	1.32683	37235	6
8	8.08	144.694	-38.2791	2015-01-21 17:45:18	0.516347	47777	6
9	9.01	144.697	-38.2817	2015-01-09 14:22:21	0.604634	179438	7
9	9.02	144.691	-38.2872	2015-01-12 11:42:42	1.35619	19491	7
9	9.05	144.69	-38.2857	2015-01-13 05:41:37	1.26945	54177	7
9	9.06	144.693	-38.2913	2015-01-15 12:19:50	1.73225	15344	7
9	9.07	144.692	-38.295	2015-01-16 14:08:46	2.15034	8399	7
9	9.08	144.688	-38.2877	2015-01-17 13:22:30	1.56553	184937	7
9	9.09	144.686	-38.286	2015-01-20 10:26:26	1.51095	202264	7
10	10.01	144.712	-38.2647	2015-01-10 07:46:43	1.74949	25273	17
10	10.02	144.686	-38.2869	2015-01-10 18:29:02	1.57015	9839	17
10	10.03	144.691	-38.2828	2015-01-11 11:17:09	0.965624	29658	17
10	10.04	144.694	-38.2884	2015-01-12 08:33:06	1.40284	32836	17
10	10.05	144.715	-38.2757	2015-01-12 17:55:16	1.49795	9397	17
10	10.07	144.714	-38.2869	2015-01-13 12:11:52	1.83019	10691	17
10	10.08	144.704	-38.2782	2015-01-14 08:27:55	0.551832	34145	17
10	10.09	144.698	-38.2875	2015-01-15 05:54:23	1.24159	23970	17
10	10.1	144.691	-38.277	2015-01-15 18:57:56	0.648152	8172	17
10	10.11	144.709	-38.2782	2015-01-16 05:58:23	0.943714	140137	17
10	10.12	144.718	-38.2806	2015-01-18 06:07:21	1.75464	16697	17
10	10.13	144.708	-38.2798	2015-01-18 16:03:54	0.973492	14746	17
10	10.14	144.71	-38.2845	2015-01-19 06:01:24	1.38947	50155	17
10	10.15	144.713	-38.2671	2015-01-20 06:36:30	1.66812	12860	17
10	10.16	144.714	-38.2872	2015-01-20 10:38:21	1.80025	34941	17
10	10.17	144.692	-38.2782	2015-01-21 06:12:34	0.585421	47361	17
10	10.18	144.708	-38.2716	2015-01-22 06:12:11	1.03093	50109	17
11	11.01	144.695	-38.2907	2015-01-09 20:27:30	1.62782	64560	9
11	11.02	144.687	-38.2838	2015-01-10 17:29:58	1.27377	74882	9
11	11.03	144.697	-38.2852	2015-01-12 10:55:40	1.00104	22120	9
11	11.04	144.691	-38.2824	2015-01-12 20:39:18	0.935871	79319	9
11	11.05	144.693	-38.281	2015-01-14 08:36:50	0.68214	26355	9
11	11.08	144.683	-38.2897	2015-01-15 05:37:03	1.98902	47621	9
11	11.09	144.695	-38.2903	2015-01-16 09:22:55	1.59534	258658	9
11	11.1	144.689	-38.2831	2015-01-19 18:08:06	1.08652	61777	9
11	11.11	144.692	-38.2853	2015-01-20 15:46:15	1.13848	147098	9
12	12.01	144.696	-38.2858	2015-01-09 15:14:11	1.08138	104986	5
12	12.02	144.691	-38.2883	2015-01-10 20:44:29	1.49363	71077	5
12	12.03	144.709	-38.2817	2015-01-11 17:02:41	1.12192	95945	5
12	12.04	144.692	-38.2863	2015-01-13 09:02:20	1.251	106217	5
12	12.05	144.693	-38.2796	2015-01-14 14:46:04	0.571776	102964	5
13	13.01	144.699	-38.2812	2015-01-09 11:12:45	0.542982	22854	12
13	13.02	144.693	-38.2876	2015-01-10 13:09:11	1.33625	63149	12
13	13.03	144.684	-38.2888	2015-01-11 14:10:32	1.88161	14871	12
13	13.04	144.694	-38.2912	2015-01-12 16:00:55	1.69731	140290	12
13	13.07	144.699	-38.2824	2015-01-14 12:01:03	0.684426	29530	12
13	13.08	144.728	-38.2821	2015-01-14 22:24:40	2.70224	42068	12
13	13.09	144.714	-38.2834	2015-01-15 15:54:19	1.57468	14437	12
13	13.1	144.71	-38.2817	2015-01-15 20:17:49	1.17746	72601	12
13	13.11	144.708	-38.2828	2015-01-16 17:14:07	1.08173	160531	12
13	13.12	144.707	-38.2838	2015-01-18 13:59:58	1.12744	145643	12
13	13.13	144.71	-38.2815	2015-01-20 16:16:17	1.16778	60378	12
13	13.14	144.696	-38.2807	2015-01-21 16:49:39	0.514132	59761	12
14	14.01	144.7	-38.2697	2015-01-11 11:15:04	0.75152	14199	7
14	14.03	144.694	-38.2799	2015-01-12 16:13:32	0.528367	91860	7
14	14.04	144.693	-38.2626	2015-01-14 13:05:19	1.58387	14004	7
14	14.06	144.692	-38.2779	2015-01-15 14:26:48	0.548667	13000	7
14	14.08	144.694	-38.2597	2015-01-17 15:50:48	1.89279	54303	7
14	14.09	144.699	-38.2565	2015-01-19 16:28:00	2.20236	53134	7
14	14.1	144.677	-38.2874	2015-01-21 09:22:55	2.22959	80484	7
15	15.01	144.696	-38.2892	2015-01-09 12:20:19	1.4513	18885	23
15	15.02	144.714	-38.2852	2015-01-10 07:52:17	1.69172	8427	23
15	15.03	144.71	-38.2918	2015-01-10 17:54:07	2.00475	9866	23
15	15.04	144.704	-38.2798	2015-01-11 06:31:22	0.627867	24676	23
15	15.06	144.706	-38.2892	2015-01-12 14:01:22	1.58991	9868	23
15	15.07	144.705	-38.2851	2015-01-12 18:01:06	1.16477	50809	23
15	15.08	144.685	-38.2816	2015-01-13 16:49:36	1.31155	3928	23
15	15.09	144.702	-38.2844	2015-01-13 19:29:10	0.95039	5012	23
15	15.1	144.705	-38.289	2015-01-14 17:26:32	1.53885	12962	23
15	15.11	144.702	-38.2811	2015-01-15 11:52:20	0.603521	11763	23
15	15.12	144.701	-38.284	2015-01-15 16:00:27	0.876373	11739	23
15	15.13	144.7	-38.2861	2015-01-16 09:46:19	1.10383	29167	23
15	15.14	144.705	-38.283	2015-01-16 19:11:44	0.941962	5686	23
15	15.15	144.702	-38.2836	2015-01-17 10:24:49	0.887668	23864	23
15	15.16	144.705	-38.2886	2015-01-17 18:34:01	1.47816	8213	23
15	15.17	144.697	-38.2876	2015-01-18 13:48:30	1.25644	24678	23
15	15.18	144.708	-38.2836	2015-01-19 06:01:06	1.19811	11280	23
15	15.19	144.71	-38.2863	2015-01-19 13:07:08	1.5276	26715	23
15	15.2	144.711	-38.2841	2015-01-20 09:13:51	1.40456	31285	23
15	15.21	144.703	-38.2802	2015-01-20 18:27:02	0.619512	7113	23
15	15.22	144.706	-38.2846	2015-01-21 06:55:18	1.164	10957	23
15	15.23	144.703	-38.2877	2015-01-21 16:14:40	1.32038	15119	23
15	15.24	144.729	-38.3072	2015-01-22 07:09:55	4.34068	15115	23
16	16.01	144.697	-38.2819	2015-01-10 09:40:57	0.63096	101027	8
16	16.02	144.696	-38.285	2015-01-11 19:16:49	0.987579	81194	8
16	16.03	144.686	-38.2971	2015-01-13 06:18:21	2.54697	184409	8
16	16.04	144.699	-38.2829	2015-01-15 17:00:20	0.74602	41274	8
16	16.05	144.697	-38.281	2015-01-16 15:05:27	0.53251	11595	8
16	16.06	144.691	-38.2875	2015-01-16 18:32:06	1.41573	155274	8
16	16.07	144.697	-38.2813	2015-01-18 14:05:15	0.565658	183817	8
16	16.08	144.689	-38.2862	2015-01-20 17:37:15	1.36526	47378	8
17	17.01	144.689	-38.2832	2015-01-09 20:18:28	1.10943	77298	6
17	17.02	144.694	-38.2807	2015-01-10 20:57:26	0.63519	2654	6
17	17.03	144.704	-38.2764	2015-01-11 04:51:50	0.50052	40904	6
17	17.04	144.705	-38.2795	2015-01-11 17:03:27	0.695427	82968	6
17	17.05	144.684	-38.2863	2015-01-12 16:44:43	1.70701	76853	6
17	17.07	144.672	-38.2915	2015-01-13 20:39:12	2.83948	45686	6
18	18.01	144.694	-38.2859	2015-01-09 17:45:16	1.12146	95906	11
18	18.02	144.689	-38.2874	2015-01-11 06:03:02	1.47578	18513	11
18	18.03	144.687	-38.28	2015-01-11 15:21:32	1.07693	20821	11
18	18.04	144.695	-38.2828	2015-01-12 05:44:21	0.785261	125554	11
18	18.05	144.679	-38.2814	2015-01-13 16:58:08	1.75475	56094	11
18	18.06	144.697	-38.2868	2015-01-14 15:19:42	1.1729	21382	11
18	18.07	144.69	-38.2843	2015-01-15 06:00:53	1.14253	48080	11
18	18.08	144.689	-38.2871	2015-01-16 06:06:58	1.44922	30289	11
18	18.09	144.696	-38.2881	2015-01-16 15:39:41	1.32959	323045	11
18	18.1	144.683	-38.2876	2015-01-20 10:08:46	1.80758	76558	11
18	18.11	144.685	-38.2905	2015-01-21 08:42:45	1.95154	121527	11
19	19.01	144.717	-38.2644	2015-01-09 11:26:27	2.12946	7902	24
19	19.02	144.707	-38.2732	2015-01-09 16:56:10	0.812645	8778	24
19	19.03	144.704	-38.2745	2015-01-10 06:33:47	0.542716	9137	24
19	19.04	144.716	-38.266	2015-01-10 11:48:24	1.93582	11878	24
19	19.05	144.719	-38.2657	2015-01-10 16:45:19	2.19414	7394	24
19	19.06	144.704	-38.2714	2015-01-11 16:13:26	0.754111	16908	24
19	19.07	144.696	-38.2811	2015-01-12 05:37:29	0.569036	15030	24
19	19.08	144.713	-38.2669	2015-01-12 16:04:28	1.68459	10206	24
19	19.1	144.705	-38.2734	2015-01-13 06:27:31	0.681509	7833	24
19	19.11	144.703	-38.2732	2015-01-13 10:54:16	0.555485	15760	24
19	19.12	144.674	-38.279	2015-01-13 17:09:29	2.1102	2152	24
19	19.13	144.705	-38.2738	2015-01-13 17:49:35	0.62396	55185	24
19	19.15	144.709	-38.2658	2015-01-14 13:36:26	1.48105	16957	24
19	19.16	144.713	-38.2675	2015-01-15 05:53:44	1.59578	13444	24
19	19.17	144.725	-38.258	2015-01-15 16:12:10	3.08908	16140	24
19	19.18	144.711	-38.2688	2015-01-16 11:32:36	1.39625	34173	24
19	19.19	144.709	-38.2632	2015-01-17 06:11:28	1.70758	44982	24
19	19.2	144.708	-38.2647	2015-01-18 05:57:36	1.54777	50550	24
19	19.21	144.687	-38.2878	2015-01-19 05:49:07	1.60565	92886	24
19	19.22	144.703	-38.2733	2015-01-20 12:50:10	0.558095	26138	24
19	19.23	144.706	-38.2699	2015-01-21 04:38:56	0.990978	14078	24
19	19.24	144.712	-38.2641	2015-01-21 10:34:44	1.80178	36161	24
19	19.25	144.708	-38.2556	2015-01-22 05:48:56	2.46883	8848	24
19	19.26	144.703	-38.2736	2015-01-22 08:59:45	0.533679	36072	24
20	20.01	144.694	-38.2833	2015-01-10 05:52:46	0.868658	26206	7
20	20.02	144.691	-38.2869	2015-01-10 20:31:53	1.32888	52091	7
20	20.04	144.69	-38.2808	2015-01-11 19:50:04	0.896626	71648	7
20	20.05	144.69	-38.2821	2015-01-13 09:57:02	0.983687	32846	7
20	20.06	144.695	-38.2801	2015-01-14 09:57:47	0.501158	38238	7
20	20.07	144.696	-38.2842	2015-01-15 09:02:59	0.891847	40942	7
20	20.08	144.69	-38.289	2015-01-16 09:21:17	1.59411	88329	7
21	21.01	144.693	-38.2858	2015-01-09 19:38:42	1.15354	54534	5
21	21.02	144.684	-38.2819	2015-01-10 19:17:04	1.36661	169416	5
21	21.03	144.692	-38.2874	2015-01-13 16:53:59	1.35491	12544	5
21	21.04	144.702	-38.2843	2015-01-14 12:14:11	0.962353	523932	5
21	21.05	144.687	-38.2937	2015-01-20 20:36:53	2.19375	36009	5
22	22.02	144.689	-38.2835	2015-01-21 07:15:09	1.13979	30142	1
23	23.01	144.7	-38.2858	2015-01-09 11:29:00	1.05967	19521	21
23	23.02	144.694	-38.2797	2015-01-10 11:18:26	0.525995	8553	21
23	23.03	144.707	-38.2856	2015-01-10 16:28:23	1.30859	15147	21
23	23.07	144.692	-38.2815	2015-01-11 14:09:12	0.801392	24101	21
23	23.08	144.699	-38.2825	2015-01-12 14:12:53	0.699124	13500	21
23	23.09	144.699	-38.293	2015-01-13 16:29:00	1.86544	4730	21
23	23.11	144.703	-38.2787	2015-01-14 09:26:52	0.51581	18319	21
23	23.12	144.708	-38.285	2015-01-14 16:35:06	1.29803	12488	21
23	23.13	144.705	-38.2776	2015-01-15 08:04:33	0.582642	14342	21
23	23.14	144.705	-38.2808	2015-01-15 17:08:27	0.745766	6786	21
23	23.15	144.687	-38.2882	2015-01-16 05:44:14	1.66275	14010	21
23	23.16	144.694	-38.2803	2015-01-16 13:32:03	0.562614	24170	21
23	23.17	144.709	-38.2832	2015-01-17 06:22:32	1.23907	10603	21
23	23.18	144.706	-38.284	2015-01-17 10:30:36	1.06169	26219	21
23	23.19	144.711	-38.2916	2015-01-18 08:56:18	2.01465	30870	21
23	23.2	144.705	-38.2822	2015-01-18 19:45:37	0.859871	3729	21
23	23.21	144.707	-38.2825	2015-01-19 07:52:33	0.997784	13335	21
23	23.22	144.693	-38.2784	2015-01-19 14:45:46	0.50737	14166	21
23	23.23	144.703	-38.286	2015-01-19 19:10:34	1.14489	5980	21
23	23.24	144.686	-38.2929	2015-01-20 05:51:45	2.16152	4722	21
23	23.25	144.717	-38.2865	2015-01-20 07:35:52	2.00872	42915	21
24	24.01	144.701	-38.282	2015-01-09 13:35:44	0.675062	23927	14
24	24.02	144.702	-38.285	2015-01-10 14:31:30	1.02899	9670	14
24	24.03	144.701	-38.288	2015-01-11 14:24:36	1.32581	73165	14
24	24.04	144.708	-38.285	2015-01-12 17:25:42	1.25951	11293	14
24	24.05	144.696	-38.2826	2015-01-13 18:49:54	0.717164	48743	14
24	24.06	144.702	-38.2855	2015-01-14 16:03:47	1.0655	10526	14
24	24.07	144.703	-38.2823	2015-01-15 18:57:38	0.78475	7565	14
24	24.08	144.707	-38.2826	2015-01-16 05:14:29	1.00985	13922	14
24	24.1	144.698	-38.2808	2015-01-18 16:59:17	0.500495	13912	14
24	24.11	144.704	-38.2821	2015-01-19 05:54:09	0.809333	3210	14
24	24.12	144.707	-38.2896	2015-01-19 09:22:35	1.65013	31222	14
24	24.13	144.711	-38.2909	2015-01-20 11:29:19	1.95812	14915	14
24	24.14	144.703	-38.2835	2015-01-21 06:04:08	0.900834	9340	14
24	24.15	144.701	-38.2849	2015-01-21 19:03:56	0.988696	6074	14
25	25.01	144.702	-38.2834	2015-01-09 13:32:00	0.847202	14510	22
25	25.02	144.708	-38.2854	2015-01-10 10:23:21	1.33715	25447	22
25	25.03	144.684	-38.2884	2015-01-11 09:14:28	1.8276	12996	22
25	25.04	144.703	-38.2849	2015-01-11 16:42:22	1.04136	14262	22
25	25.05	144.704	-38.2876	2015-01-12 06:00:46	1.36918	18256	22
25	25.06	144.699	-38.2859	2015-01-12 16:42:29	1.07264	6723	22
25	25.07	144.674	-38.2791	2015-01-13 17:07:53	2.14077	2262	22
25	25.08	144.704	-38.2834	2015-01-13 17:54:02	0.94607	10394	22
25	25.09	144.709	-38.2843	2015-01-14 12:38:38	1.2812	30188	22
25	25.1	144.713	-38.2871	2015-01-15 11:10:30	1.73967	30476	22
25	25.11	144.703	-38.2804	2015-01-15 20:00:40	0.636006	3474	22
25	25.12	144.691	-38.2829	2015-01-16 10:23:31	0.975574	30382	22
25	25.13	144.709	-38.2886	2015-01-17 06:31:37	1.64342	51614	22
25	25.14	144.706	-38.2826	2015-01-18 08:47:38	0.989157	13368	22
25	25.15	144.707	-38.2864	2015-01-18 12:43:19	1.3623	29263	22
25	25.16	144.705	-38.2824	2015-01-19 06:34:16	0.883608	51507	22
25	25.17	144.693	-38.2867	2015-01-20 05:47:02	1.2566	8490	22
25	25.18	144.707	-38.2807	2015-01-20 08:35:28	0.893675	42446	22
25	25.19	144.679	-38.2927	2015-01-20 20:42:01	2.50322	36154	22
25	25.2	144.707	-38.2826	2015-01-21 07:07:03	1.00474	9837	22
25	25.21	144.709	-38.2846	2015-01-21 10:51:55	1.3313	35903	22
25	25.22	144.707	-38.2822	2015-01-22 09:10:33	1.03075	41092	22
26	26.01	144.703	-38.2828	2015-01-09 13:59:07	0.836003	19885	14
26	26.02	144.691	-38.2919	2015-01-09 20:29:24	1.83984	60872	14
26	26.03	144.694	-38.2899	2015-01-10 13:47:14	1.55925	99125	14
26	26.04	144.684	-38.2848	2015-01-11 17:34:07	1.56131	79213	14
26	26.05	144.681	-38.2973	2015-01-13 07:55:30	2.78732	22188	14
26	26.06	144.693	-38.2804	2015-01-13 16:06:56	0.667882	4857	14
26	26.07	144.686	-38.2759	2015-01-13 17:36:21	1.05924	60493	14
26	26.08	144.691	-38.2798	2015-01-14 12:35:13	0.770014	111282	14
26	26.09	144.696	-38.2831	2015-01-15 19:52:55	0.777401	324012	14
26	26.11	144.679	-38.2849	2015-01-19 19:41:43	1.93087	43703	14
26	26.12	144.693	-38.2813	2015-01-20 08:49:45	0.736612	32556	14
26	26.13	144.692	-38.2794	2015-01-20 19:10:41	0.616393	44894	14
26	26.14	144.672	-38.3032	2015-01-21 10:36:12	3.78739	27720	14
26	26.16	144.687	-38.2849	2015-01-22 06:22:31	1.36211	21699	14
27	27.01	144.693	-38.288	2015-01-09 14:32:53	1.36781	21490	15
27	27.02	144.697	-38.2807	2015-01-10 05:45:28	0.506171	38090	15
27	27.03	144.696	-38.2819	2015-01-10 16:37:12	0.663674	85330	15
27	27.04	144.689	-38.2811	2015-01-11 16:28:48	0.979224	74839	15
27	27.05	144.696	-38.291	2015-01-12 13:33:25	1.64854	17025	15
27	27.06	144.689	-38.2818	2015-01-12 19:43:06	0.996826	5073	15
27	27.07	144.683	-38.2934	2015-01-13 06:20:04	2.33921	37880	15
27	27.08	144.671	-38.2796	2015-01-13 17:05:27	2.40162	2516	15
27	27.09	144.679	-38.2918	2015-01-13 19:07:54	2.444	62294	15
27	27.1	144.692	-38.2905	2015-01-15 05:48:10	1.68625	50393	15
27	27.11	144.693	-38.2859	2015-01-16 05:46:52	1.15536	11140	15
27	27.12	144.694	-38.2907	2015-01-16 10:18:44	1.64363	124698	15
27	27.13	144.692	-38.2842	2015-01-18 05:36:03	1.03699	127847	15
27	27.14	144.692	-38.2891	2015-01-19 17:19:25	1.51153	169092	15
27	27.15	144.686	-38.2849	2015-01-21 16:37:29	1.43318	93764	15
28	28.01	144.69	-38.2879	2015-01-09 11:39:26	1.45894	14379	8
28	28.03	144.687	-38.2861	2015-01-10 14:10:19	1.44336	83055	8
28	28.08	144.687	-38.2888	2015-01-12 14:28:29	1.68412	10772	8
28	28.1	144.705	-38.2804	2015-01-14 07:33:33	0.758722	33215	8
28	28.11	144.694	-38.2843	2015-01-15 09:14:13	0.97939	90644	8
28	28.13	144.699	-38.2833	2015-01-16 16:09:26	0.781482	156447	8
28	28.14	144.692	-38.2771	2015-01-19 11:56:36	0.558237	68515	8
28	28.15	144.694	-38.2798	2015-01-20 13:57:50	0.540116	90578	8
29	29.01	144.708	-38.2819	2015-01-09 12:53:50	1.0484	20993	6
29	29.02	144.707	-38.2816	2015-01-10 08:04:04	0.982129	21405	6
29	29.03	144.686	-38.2847	2015-01-10 18:10:32	1.40857	87436	6
29	29.04	144.711	-38.2788	2015-01-11 18:47:12	1.16711	397754	6
29	29.05	144.694	-38.2797	2015-01-16 12:15:01	0.51965	351105	6
29	29.06	144.693	-38.2791	2015-01-20 14:24:45	0.538935	173217	6
30	30.01	144.7	-38.2811	2015-01-09 12:11:59	0.549754	20757	10
30	30.02	144.693	-38.2889	2015-01-09 19:35:48	1.48277	92658	10
30	30.03	144.691	-38.2852	2015-01-11 05:39:12	1.19255	28137	10
30	30.04	144.699	-38.289	2015-01-11 14:55:34	1.41096	92914	10
30	30.05	144.691	-38.2825	2015-01-12 17:07:48	0.955186	180259	10
30	30.06	144.691	-38.2819	2015-01-14 19:26:51	0.890409	169926	10
30	30.07	144.692	-38.2869	2015-01-16 19:26:42	1.31426	6887	10
30	30.08	144.688	-38.285	2015-01-17 05:46:59	1.32101	94883	10
30	30.09	144.686	-38.2859	2015-01-18 08:50:30	1.53655	40475	10
30	30.1	144.692	-38.2864	2015-01-19 06:57:16	1.25237	177825	10
31	31.01	144.7	-38.2875	2015-01-09 11:50:38	1.25731	72112	9
31	31.02	144.682	-38.2837	2015-01-10 20:21:47	1.62451	3482	9
31	31.03	144.682	-38.2828	2015-01-11 05:53:05	1.60178	3660	9
31	31.04	144.69	-38.2884	2015-01-11 13:09:36	1.54217	8728	9
31	31.07	144.693	-38.2935	2015-01-12 12:30:05	1.978	185886	9
31	31.08	144.698	-38.283	2015-01-15 09:15:32	0.747798	381924	9
31	31.09	144.699	-38.2818	2015-01-20 13:45:12	0.619094	64395	9
31	31.1	144.682	-38.2935	2015-01-21 15:08:50	2.36878	56109	9
31	31.11	144.696	-38.2822	2015-01-22 07:29:29	0.693325	38036	9
32	32.01	144.701	-38.2611	2015-01-09 12:35:11	1.70973	4731	12
32	32.02	144.702	-38.2617	2015-01-09 17:06:23	1.66326	49839	12
32	32.04	144.692	-38.2779	2015-01-10 08:35:18	0.541893	2459	12
32	32.06	144.684	-38.2897	2015-01-10 18:11:42	1.96465	51467	12
32	32.07	144.698	-38.2576	2015-01-11 10:40:21	2.08548	3160	12
32	32.08	144.718	-38.284	2015-01-11 17:05:39	1.96216	8378	12
32	32.09	144.681	-38.2868	2015-01-11 19:36:25	1.92919	57276	12
32	32.1	144.703	-38.2731	2015-01-12 15:29:50	0.526418	4195	12
32	32.12	144.67	-38.2797	2015-01-13 17:01:52	2.48696	4796	12
32	32.13	144.688	-38.2848	2015-01-13 19:19:21	1.29999	57455	12
32	32.14	144.694	-38.2695	2015-01-14 11:27:54	0.834801	5642	12
32	32.15	144.688	-38.2774	2015-01-14 17:23:31	0.88137	152344	12
33	33.01	144.688	-38.2782	2015-01-09 13:09:25	0.927961	13182	10
33	33.02	144.68	-38.2813	2015-01-10 07:57:06	1.69918	28820	10
33	33.03	144.679	-38.2821	2015-01-11 10:20:19	1.76815	38410	10
33	33.04	144.695	-38.2895	2015-01-12 05:43:36	1.50184	39471	10
33	33.05	144.683	-38.2826	2015-01-13 12:51:39	1.52724	69095	10
33	33.06	144.697	-38.2856	2015-01-14 15:00:22	1.0439	87666	10
33	33.07	144.681	-38.2769	2015-01-15 16:37:10	1.55438	8346	10
33	33.08	144.689	-38.2795	2015-01-16 06:25:30	0.92658	41809	10
33	33.09	144.69	-38.285	2015-01-17 15:29:36	1.22516	314589	10
33	33.1	144.685	-38.2818	2015-01-21 08:49:43	1.28864	28394	10
34	34.01	144.695	-38.2808	2015-01-11 10:06:32	0.575956	24757	4
34	34.02	144.684	-38.2922	2015-01-12 07:06:11	2.1806	37447	4
34	34.03	144.687	-38.286	2015-01-12 18:54:26	1.48304	259290	4
34	34.04	144.691	-38.2682	2015-01-15 20:13:42	1.12088	398386	4
35	35.01	144.694	-38.2828	2015-01-09 17:09:40	0.806595	78753	11
35	35.02	144.698	-38.2813	2015-01-10 17:55:47	0.557547	77525	11
35	35.03	144.698	-38.2818	2015-01-11 18:42:04	0.615166	8808	11
35	35.05	144.693	-38.2822	2015-01-12 12:09:09	0.812303	23024	11
35	35.07	144.681	-38.2842	2015-01-13 17:39:47	1.75267	49521	11
35	35.08	144.705	-38.2612	2015-01-14 07:48:07	1.79164	26996	11
35	35.1	144.707	-38.2703	2015-01-15 07:27:49	0.991639	18865	11
35	35.11	144.704	-38.2786	2015-01-15 17:12:02	0.592477	13058	11
35	35.12	144.693	-38.288	2015-01-16 09:11:32	1.38005	87614	11
35	35.13	144.689	-38.2837	2015-01-17 18:49:17	1.13637	8285	11
35	35.16	144.695	-38.2801	2015-01-18 13:10:53	0.515415	86965	11
36	36.01	144.696	-38.2846	2015-01-09 14:04:56	0.952263	62079	12
36	36.02	144.688	-38.2913	2015-01-10 16:54:02	1.88404	50326	12
36	36.03	144.687	-38.289	2015-01-11 18:01:27	1.72656	45815	12
36	36.04	144.705	-38.2732	2015-01-12 16:09:22	0.701153	71417	12
36	36.05	144.702	-38.2828	2015-01-14 15:13:13	0.804534	62014	12
36	36.07	144.698	-38.2823	2015-01-16 11:44:36	0.667389	35717	12
36	36.08	144.684	-38.2886	2015-01-17 05:51:54	1.86331	112913	12
36	36.09	144.697	-38.2887	2015-01-18 15:08:12	1.3878	12155	12
36	36.11	144.688	-38.2908	2015-01-19 05:47:54	1.8488	50538	12
36	36.12	144.697	-38.2837	2015-01-20 07:11:33	0.831033	13349	12
36	36.13	144.686	-38.2958	2015-01-20 12:30:27	2.43009	67869	12
36	36.14	144.689	-38.2908	2015-01-21 17:45:23	1.79931	65707	12
37	37.01	144.703	-38.2866	2015-01-09 13:05:57	1.22061	22418	11
37	37.02	144.692	-38.2854	2015-01-10 05:53:12	1.13168	118742	11
37	37.03	144.688	-38.2832	2015-01-11 19:55:27	1.15999	81352	11
37	37.04	144.685	-38.294	2015-01-12 19:24:59	2.30315	160901	11
37	37.05	144.704	-38.2735	2015-01-14 16:50:11	0.557365	14138	11
37	37.06	144.708	-38.265	2015-01-15 08:46:37	1.52102	40741	11
37	37.07	144.692	-38.2835	2015-01-16 10:19:07	0.957488	123090	11
37	37.08	144.705	-38.2629	2015-01-18 06:39:18	1.6058	23513	11
37	37.09	144.715	-38.2714	2015-01-18 17:23:48	1.56857	14273	11
37	37.1	144.694	-38.283	2015-01-19 05:48:08	0.848315	55690	11
37	37.11	144.71	-38.29	2015-01-20 06:58:16	1.8259	93331	11
38	38.01	144.688	-38.2895	2015-01-10 13:34:43	1.70272	84446	6
38	38.02	144.684	-38.2857	2015-01-11 19:30:11	1.59892	66234	6
38	38.05	144.689	-38.2869	2015-01-13 14:23:04	1.45509	9980	6
38	38.06	144.691	-38.2821	2015-01-14 12:36:01	0.919328	112681	6
38	38.08	144.686	-38.2895	2015-01-19 14:00:53	1.79765	84473	6
38	38.09	144.686	-38.2843	2015-01-21 06:43:33	1.36585	51795	6
39	39.01	144.702	-38.2813	2015-01-09 17:19:17	0.626025	59221	27
39	39.02	144.681	-38.2839	2015-01-11 15:13:43	1.7278	15179	27
39	39.04	144.682	-38.2944	2015-01-12 09:08:42	2.47393	26260	27
39	39.05	144.709	-38.286	2015-01-12 17:13:09	1.44033	11909	27
39	39.06	144.703	-38.2809	2015-01-13 07:16:31	0.638324	29743	27
39	39.07	144.701	-38.2842	2015-01-13 16:17:37	0.901772	5035	27
39	39.08	144.705	-38.2844	2015-01-13 19:49:44	1.06062	57946	27
39	39.09	144.704	-38.2822	2015-01-14 13:57:06	0.804679	19289	27
39	39.1	144.704	-38.291	2015-01-15 06:57:52	1.7115	9405	27
39	39.11	144.701	-38.2806	2015-01-15 09:49:31	0.55051	12574	27
39	39.12	144.696	-38.282	2015-01-15 13:27:56	0.663749	17235	27
39	39.13	144.704	-38.278	2015-01-15 18:27:40	0.556204	9161	27
39	39.14	144.713	-38.2984	2015-01-16 06:17:36	2.78657	11830	27
39	39.15	144.7	-38.2846	2015-01-16 15:04:20	0.934031	11745	27
39	39.16	144.703	-38.2805	2015-01-16 18:34:16	0.594862	4685	27
39	39.17	144.702	-38.2855	2015-01-17 06:12:55	1.08405	11390	27
39	39.18	144.709	-38.2902	2015-01-17 09:38:58	1.819	36076	27
39	39.19	144.701	-38.286	2015-01-17 19:50:09	1.10248	4649	27
39	39.21	144.707	-38.2845	2015-01-18 08:45:23	1.21158	18059	27
39	39.22	144.702	-38.2808	2015-01-18 13:54:25	0.595679	23541	27
39	39.23	144.703	-38.2824	2015-01-19 06:17:04	0.78625	9708	27
39	39.24	144.693	-38.2814	2015-01-19 09:34:41	0.709879	38290	27
39	39.25	144.708	-38.2957	2015-01-20 06:00:24	2.31572	51189	27
39	39.26	144.678	-38.2897	2015-01-20 20:31:36	2.34148	36092	27
39	39.27	144.716	-38.287	2015-01-21 07:27:12	1.92047	7834	27
39	39.28	144.702	-38.2823	2015-01-21 12:37:06	0.733725	64764	27
39	39.29	144.702	-38.2828	2015-01-22 06:57:47	0.786825	12418	27
40	40.01	144.695	-38.2838	2015-01-09 15:50:03	0.888851	15649	7
40	40.02	144.695	-38.281	2015-01-10 13:42:56	0.589419	79550	7
40	40.05	144.693	-38.2871	2015-01-12 08:48:35	1.27283	122962	7
40	40.06	144.693	-38.2883	2015-01-14 14:11:59	1.40869	101864	7
40	40.07	144.689	-38.292	2015-01-16 06:11:25	1.94685	52741	7
40	40.09	144.695	-38.2852	2015-01-18 13:56:20	1.02656	78163	7
40	40.1	144.685	-38.2852	2015-01-20 19:21:44	1.53032	42351	7
41	41.02	144.689	-38.2882	2015-01-10 05:53:52	1.54266	21426	11
41	41.04	144.684	-38.2903	2015-01-11 10:55:30	2.00573	6832	11
41	41.06	144.696	-38.2816	2015-01-11 15:03:57	0.612919	57894	11
41	41.07	144.695	-38.2832	2015-01-12 07:41:23	0.826857	17225	11
41	41.08	144.693	-38.2832	2015-01-12 12:57:24	0.893997	12958	11
41	41.09	144.689	-38.2909	2015-01-13 08:14:03	1.81763	29154	11
41	41.11	144.694	-38.2849	2015-01-13 18:55:42	1.02201	56756	11
41	41.13	144.695	-38.2867	2015-01-15 06:14:23	1.18659	24939	11
41	41.14	144.695	-38.2822	2015-01-15 13:42:03	0.703421	268728	11
41	41.15	144.696	-38.282	2015-01-18 16:52:29	0.653887	177123	11
41	41.16	144.684	-38.2945	2015-01-20 18:33:18	2.37424	45191	11
42	42.01	144.697	-38.2806	2015-01-09 19:50:00	0.500469	124514	11
42	42.02	144.692	-38.2797	2015-01-11 21:32:12	0.6363	120430	11
42	42.03	144.695	-38.2824	2015-01-13 14:44:48	0.729011	7555	11
42	42.04	144.695	-38.2845	2015-01-14 14:46:54	0.962025	18576	11
42	42.05	144.691	-38.2872	2015-01-15 09:15:02	1.36955	14793	11
42	42.06	144.685	-38.2752	2015-01-15 20:09:18	1.18229	127593	11
42	42.07	144.674	-38.2936	2015-01-17 14:36:54	2.84225	13873	11
42	42.08	144.685	-38.2794	2015-01-17 18:44:47	1.17698	52553	11
42	42.09	144.69	-38.2848	2015-01-18 10:37:53	1.18369	38067	11
42	42.11	144.695	-38.2801	2015-01-19 05:47:44	0.519419	179879	11
42	42.12	144.689	-38.2854	2015-01-21 13:57:08	1.3294	62444	11
43	43.01	144.701	-38.282	2015-01-10 17:34:06	0.664861	11824	18
43	43.02	144.683	-38.2869	2015-01-11 11:39:53	1.81495	18927	18
43	43.03	144.691	-38.2851	2015-01-12 09:45:52	1.15735	24597	18
43	43.04	144.697	-38.2822	2015-01-13 14:16:20	0.661122	22371	18
43	43.06	144.697	-38.2815	2015-01-14 09:50:01	0.591293	37198	18
43	43.07	144.705	-38.2819	2015-01-15 09:14:46	0.863746	29030	18
43	43.09	144.711	-38.2951	2015-01-16 14:07:58	2.39075	15228	18
43	43.1	144.707	-38.2913	2015-01-16 18:36:18	1.8469	8203	18
43	43.11	144.699	-38.2843	2015-01-17 06:30:42	0.895025	20493	18
43	43.12	144.705	-38.2821	2015-01-17 14:44:58	0.847424	22442	18
43	43.13	144.699	-38.286	2015-01-18 06:18:29	1.07905	8680	18
43	43.14	144.689	-38.2885	2015-01-18 09:16:49	1.56661	40936	18
43	43.15	144.7	-38.2934	2015-01-19 06:10:28	1.90192	30888	18
43	43.16	144.708	-38.2913	2015-01-19 15:24:58	1.86361	17294	18
43	43.17	144.709	-38.2877	2015-01-20 06:12:28	1.56364	10574	18
43	43.18	144.706	-38.2831	2015-01-20 13:59:06	0.999201	23552	18
43	43.19	144.7	-38.289	2015-01-21 06:15:07	1.42478	9182	18
43	48.2	144.711	-38.281	2015-01-21 09:00:45	1.20009	90796	18
44	44.01	144.684	-38.2899	2015-01-09 20:46:44	1.94948	44872	12
44	44.02	144.691	-38.2865	2015-01-10 16:24:48	1.32116	68014	12
44	44.03	144.691	-38.2806	2015-01-11 15:43:37	0.816425	90110	12
44	44.05	144.681	-38.2927	2015-01-12 18:35:09	2.34962	50051	12
44	44.06	144.693	-38.2904	2015-01-13 16:29:44	1.62812	3317	12
44	44.07	144.696	-38.2853	2015-01-13 17:36:21	1.02876	47725	12
44	44.08	144.695	-38.2819	2015-01-14 10:47:59	0.684547	37059	12
44	44.09	144.694	-38.2825	2015-01-14 21:18:35	0.788304	76580	12
44	44.1	144.695	-38.2807	2015-01-15 18:44:57	0.544295	156876	12
44	44.11	144.694	-38.2828	2015-01-17 14:37:48	0.804166	146087	12
44	44.12	144.692	-38.2828	2015-01-19 07:23:06	0.926304	100479	12
44	44.13	144.69	-38.2873	2015-01-20 11:28:19	1.43773	94456	12
45	45.02	144.691	-38.2824	2015-01-10 18:24:41	0.951531	58024	4
45	45.04	144.711	-38.2799	2015-01-11 17:09:04	1.21474	94899	4
45	45.05	144.71	-38.2583	2015-01-15 13:40:13	2.23904	92968	4
45	45.06	144.694	-38.2816	2015-01-18 10:07:18	0.720872	167533	4
46	46.01	144.691	-38.2843	2015-01-09 17:33:34	1.08614	149416	7
46	46.03	144.7	-38.2868	2015-01-11 15:38:03	1.16961	88347	7
46	46.04	144.694	-38.2843	2015-01-13 17:59:42	0.962886	67865	7
46	46.05	144.697	-38.2838	2015-01-14 17:27:02	0.841542	66978	7
46	46.06	144.695	-38.2855	2015-01-16 05:57:42	1.07613	121587	7
46	46.07	144.695	-38.2861	2015-01-18 07:11:05	1.12816	119512	7
46	46.09	144.706	-38.2832	2015-01-20 07:26:39	1.04566	92801	7
47	47.01	144.697	-38.2837	2015-01-10 08:14:53	0.828581	93935	3
47	47.02	144.7	-38.2806	2015-01-11 14:40:04	0.500178	85894	3
47	47.04	144.69	-38.287	2015-01-12 17:25:05	1.38589	592398	3
48	48.02	144.694	-38.2854	2015-01-09 14:30:08	1.07344	12171	16
48	48.03	144.699	-38.2826	2015-01-09 18:01:11	0.704835	54105	16
48	48.04	144.693	-38.2849	2015-01-10 11:43:05	1.05557	73592	16
48	48.06	144.695	-38.2828	2015-01-11 20:01:34	0.788948	4544	16
48	48.07	144.689	-38.2939	2015-01-12 05:34:39	2.13047	11769	16
48	48.09	144.695	-38.2888	2015-01-13 05:39:33	1.43194	18226	16
48	48.1	144.698	-38.2846	2015-01-13 18:30:58	0.923666	54434	16
48	48.11	144.696	-38.2878	2015-01-14 15:04:51	1.29292	67919	16
48	48.12	144.693	-38.2794	2015-01-15 12:41:05	0.560556	18985	16
48	48.13	144.69	-38.286	2015-01-16 05:36:14	1.28966	16190	16
48	48.14	144.69	-38.2899	2015-01-16 18:32:29	1.69566	45254	16
48	48.15	144.693	-38.2892	2015-01-17 10:25:12	1.52208	77807	16
48	48.16	144.695	-38.2954	2015-01-18 10:04:33	2.15253	78661	16
48	48.17	144.698	-38.2915	2015-01-19 16:08:59	1.69696	58270	16
48	48.18	144.69	-38.288	2015-01-20 15:50:47	1.46979	67577	16
48	48.19	144.69	-38.2948	2015-01-21 17:21:23	2.18491	54942	16
49	49.01	144.692	-38.2824	2015-01-10 10:31:49	0.894057	88903	11
49	49.02	144.694	-38.2874	2015-01-11 14:18:21	1.29506	14767	11
49	49.03	144.691	-38.283	2015-01-12 13:49:08	0.978152	24325	11
49	49.04	144.686	-38.2916	2015-01-13 07:54:04	1.98931	37362	11
49	49.06	144.691	-38.2851	2015-01-15 14:45:03	1.17458	21385	11
49	49.08	144.692	-38.2758	2015-01-16 00:32:30	0.528404	56642	11
49	49.09	144.687	-38.2842	2015-01-17 06:47:15	1.344	132551	11
49	49.1	144.688	-38.2869	2015-01-19 07:12:59	1.4968	22608	11
49	49.12	144.686	-38.2838	2015-01-20 15:32:20	1.34169	13175	11
49	49.13	144.684	-38.2847	2015-01-21 09:25:02	1.57162	35510	11
49	49.14	144.685	-38.2894	2015-01-22 07:11:28	1.84745	44649	11
50	50.01	144.693	-38.2801	2015-01-09 19:04:17	0.610543	4508	5
50	50.02	144.693	-38.2872	2015-01-10 13:12:32	1.2834	85087	5
50	50.04	144.695	-38.2827	2015-01-12 08:28:27	0.774855	18175	5
50	50.05	144.69	-38.2929	2015-01-12 19:28:34	1.98339	69251	5
50	50.07	144.708	-38.2876	2015-01-14 15:34:08	1.51944	229235	5
51	51.01	144.694	-38.283	2015-01-09 14:09:40	0.852542	66278	8
51	51.02	144.682	-38.2894	2015-01-10 21:02:50	2.05284	75380	8
51	51.03	144.691	-38.2897	2015-01-12 07:02:30	1.63404	109384	8
51	51.05	144.699	-38.2811	2015-01-14 15:18:45	0.544438	346052	8
51	51.06	144.695	-38.28	2015-01-18 16:31:47	0.508557	13877	8
51	51.07	144.693	-38.287	2015-01-18 20:36:44	1.27734	134501	8
51	51.08	144.685	-38.299	2015-01-20 12:10:00	2.7894	74635	8
51	51.09	144.694	-38.2847	2015-01-21 16:51:31	0.99057	3543	8
52	52.01	144.689	-38.2865	2015-01-10 15:59:20	1.41931	75279	5
52	52.02	144.699	-38.2811	2015-01-12 14:41:07	0.540624	19055	5
52	52.03	144.705	-38.2848	2015-01-14 08:08:49	1.12431	39686	5
52	52.07	144.689	-38.2892	2015-01-17 09:19:01	1.65688	121883	5
52	52.09	144.692	-38.2816	2015-01-19 16:17:11	0.807874	81699	5
53	53.01	144.705	-38.2788	2015-01-10 14:33:19	0.687059	11972	13
53	53.02	144.715	-38.2907	2015-01-10 19:54:30	2.15552	39029	13
53	53.03	144.691	-38.2814	2015-01-11 08:32:25	0.871639	21001	13
53	53.06	144.705	-38.2783	2015-01-11 18:53:57	0.652818	3743	13
53	53.07	144.689	-38.2844	2015-01-11 20:02:43	1.2026	51796	13
53	53.09	144.705	-38.2705	2015-01-13 08:26:49	0.879601	79937	13
53	53.1	144.694	-38.2804	2015-01-14 10:25:33	0.58937	106525	13
53	53.11	144.713	-38.272	2015-01-16 06:04:40	1.35078	3188	13
53	53.12	144.691	-38.2797	2015-01-16 16:35:03	0.705638	349919	13
53	53.13	144.695	-38.2811	2015-01-21 05:56:16	0.603455	4316	13
53	53.15	144.691	-38.2818	2015-01-21 10:57:49	0.873142	21189	13
53	53.16	144.695	-38.2814	2015-01-22 05:52:26	0.625751	6332	13
53	53.17	144.706	-38.2624	2015-01-22 08:20:21	1.70281	31356	13
54	54.01	144.687	-38.2898	2015-01-10 10:09:43	1.78159	106652	11
54	54.02	144.693	-38.2839	2015-01-12 08:53:25	0.974651	38631	11
54	54.03	144.69	-38.2938	2015-01-13 14:52:38	2.0673	108224	11
54	54.04	144.704	-38.2721	2015-01-15 06:28:24	0.708514	11394	11
54	54.06	144.711	-38.262	2015-01-15 14:33:06	1.93271	18967	11
54	54.07	144.713	-38.268	2015-01-16 09:02:11	1.59698	102266	11
54	54.09	144.698	-38.2846	2015-01-18 05:59:46	0.923211	37033	11
54	54.1	144.709	-38.2686	2015-01-18 18:10:51	1.2411	52468	11
54	54.12	144.746	-38.2326	2015-01-19 19:19:59	6.42856	49036	11
54	54.13	144.705	-38.2716	2015-01-20 13:00:57	0.791283	28420	11
54	54.14	144.687	-38.286	2015-01-21 06:04:59	1.48638	44407	11
55	55.01	144.701	-38.2807	2015-01-10 08:55:47	0.56405	94524	17
55	55.04	144.69	-38.2817	2015-01-11 17:52:52	0.917724	83042	17
55	55.05	144.693	-38.2818	2015-01-12 17:29:49	0.76359	83861	17
55	55.06	144.71	-38.2826	2015-01-13 19:21:35	1.21689	4713	17
55	55.07	144.71	-38.2809	2015-01-14 06:59:23	1.10502	37679	17
55	55.08	144.706	-38.2802	2015-01-14 17:39:32	0.825645	66367	17
55	55.09	144.712	-38.2863	2015-01-15 12:20:30	1.60583	16222	17
55	58.1	144.686	-38.2892	2015-01-16 06:43:51	1.76991	44927	17
55	55.11	144.713	-38.29	2015-01-17 07:04:52	2.01901	36190	17
55	55.12	144.684	-38.2834	2015-01-17 17:22:42	1.46496	10818	17
55	55.13	144.704	-38.2785	2015-01-18 08:10:33	0.575496	33391	17
55	55.14	144.707	-38.2832	2015-01-19 06:54:17	1.06152	45676	17
55	55.15	144.705	-38.2798	2015-01-20 10:59:34	0.715562	33631	17
55	55.16	144.693	-38.282	2015-01-21 05:56:29	0.776057	8582	17
55	55.17	144.689	-38.2899	2015-01-21 12:50:49	1.72189	29879	17
55	55.18	144.687	-38.2879	2015-01-22 05:54:03	1.62538	2466	17
55	55.19	144.715	-38.2879	2015-01-22 06:39:15	1.9731	46122	17
56	56.01	144.711	-38.2837	2015-01-09 14:40:35	1.40744	22069	18
56	56.02	144.713	-38.263	2015-01-10 06:13:24	1.95465	6729	18
56	56.03	144.693	-38.2786	2015-01-10 09:13:20	0.526301	32524	18
56	56.04	144.711	-38.257	2015-01-10 18:45:25	2.41899	42983	18
56	56.05	144.709	-38.2841	2015-01-11 16:29:32	1.24521	12408	18
56	56.06	144.688	-38.2841	2015-01-12 11:08:11	1.25815	17001	18
56	56.07	144.691	-38.2794	2015-01-12 19:27:59	0.722078	88563	18
56	56.08	144.715	-38.2662	2015-01-14 06:50:25	1.84366	30475	18
56	56.09	144.714	-38.2891	2015-01-15 08:25:10	2.00458	14849	18
56	56.11	144.706	-38.2857	2015-01-15 14:40:46	1.22634	16424	18
56	56.13	144.727	-38.2966	2015-01-16 11:07:28	3.38455	29320	18
56	56.14	144.711	-38.2808	2015-01-17 08:27:11	1.21267	44190	18
56	56.15	144.719	-38.2848	2015-01-18 06:53:53	2.01666	21727	18
56	56.16	144.711	-38.2843	2015-01-18 13:13:15	1.44959	27696	18
56	56.17	144.708	-38.2822	2015-01-19 06:10:12	1.10672	50486	18
56	56.19	144.716	-38.2873	2015-01-20 06:17:18	1.9937	47086	18
56	56.2	144.693	-38.2829	2015-01-21 05:43:14	0.864418	3845	18
56	56.21	144.704	-38.28	2015-01-21 07:15:43	0.635977	134482	18
57	57.01	144.694	-38.287	2015-01-09 19:35:33	1.24282	162073	3
57	57.02	144.697	-38.2814	2015-01-12 04:00:44	0.589849	49750	3
57	57.03	144.694	-38.2839	2015-01-13 04:24:24	0.942835	789290	3
58	58.01	144.693	-38.2888	2015-01-10 07:00:32	1.45276	95577	4
58	58.02	144.675	-38.2858	2015-01-11 12:57:06	2.33039	95203	4
58	58.03	144.69	-38.2827	2015-01-12 16:40:13	0.988405	80209	4
58	58.04	144.691	-38.2748	2015-01-13 17:22:04	0.667561	11868	4
59	59.01	144.695	-38.2799	2015-01-10 16:45:31	0.501315	54386	11
59	59.02	144.682	-38.2873	2015-01-11 10:39:27	1.87434	13817	11
59	59.03	144.695	-38.2851	2015-01-12 09:17:11	1.02311	27833	11
59	59.04	144.696	-38.2832	2015-01-13 16:30:16	0.79431	69323	11
59	59.05	144.71	-38.2684	2015-01-14 17:05:34	1.34222	52768	11
59	59.06	144.714	-38.2649	2015-01-15 15:27:06	1.88274	63034	11
59	59.07	144.706	-38.2707	2015-01-16 17:33:23	0.885487	51245	11
59	59.08	144.692	-38.2833	2015-01-17 14:32:54	0.968691	74858	11
59	59.09	144.707	-38.2619	2015-01-18 18:32:47	1.79067	62585	11
59	59.1	144.707	-38.2692	2015-01-20 05:51:30	1.08155	11513	11
59	59.11	144.683	-38.2903	2015-01-20 17:58:59	2.03968	9369	11
60	60.01	144.689	-38.2817	2015-01-09 14:44:46	1.02561	57566	12
60	60.02	144.697	-38.2817	2015-01-10 07:12:12	0.612748	33951	12
60	60.03	144.695	-38.2808	2015-01-10 16:57:44	0.575258	35136	12
60	60.04	144.692	-38.2793	2015-01-11 12:11:03	0.635719	19069	12
60	60.05	144.671	-38.2858	2015-01-11 19:07:33	2.59584	71873	12
60	60.06	144.688	-38.2813	2015-01-12 18:24:59	1.03162	88922	12
60	60.07	144.681	-38.2814	2015-01-13 19:28:21	1.59351	51686	12
60	60.09	144.695	-38.2842	2015-01-14 19:43:03	0.932369	68342	12
60	60.1	144.679	-38.2782	2015-01-15 16:41:40	1.67702	15549	12
60	60.11	144.689	-38.2823	2015-01-16 05:54:03	1.02297	45716	12
60	60.12	144.692	-38.2784	2015-01-16 18:48:54	0.563354	160210	12
60	60.13	144.687	-38.277	2015-01-18 17:36:28	0.980033	76900	12
61	61.01	144.694	-38.2805	2015-01-09 13:37:09	0.589698	73390	9
61	61.02	144.693	-38.2797	2015-01-11 15:52:22	0.631731	60749	9
61	61.03	144.691	-38.286	2015-01-12 17:26:06	1.25228	8672	9
61	61.05	144.697	-38.2845	2015-01-13 07:16:27	0.911804	26406	9
61	61.06	144.695	-38.2831	2015-01-14 18:51:32	0.814506	136935	9
61	61.08	144.694	-38.2874	2015-01-17 13:34:36	1.29339	159079	9
61	61.09	144.686	-38.291	2015-01-19 10:04:56	1.97583	33145	9
61	61.1	144.683	-38.2976	2015-01-20 09:06:32	2.70933	86591	9
61	61.12	144.692	-38.2887	2015-01-21 18:36:06	1.47632	44813	9
62	62.01	144.697	-38.2884	2015-01-09 15:59:48	1.34884	65952	7
62	62.02	144.686	-38.2822	2015-01-11 11:28:35	1.25879	8968	7
62	62.03	144.695	-38.2822	2015-01-11 19:24:24	0.706772	65060	7
62	62.05	144.676	-38.283	2015-01-13 18:27:06	2.06534	158911	7
62	62.06	144.693	-38.2843	2015-01-16 16:25:06	0.995084	51236	7
62	62.07	144.695	-38.2821	2015-01-18 13:31:05	0.702601	62740	7
62	62.08	144.692	-38.2822	2015-01-19 13:39:25	0.866373	157138	7
63	63.01	144.704	-38.2827	2015-01-09 14:21:37	0.871343	59290	13
63	63.02	144.692	-38.2891	2015-01-10 07:15:03	1.54204	9633	13
63	63.03	144.689	-38.2839	2015-01-10 10:16:41	1.15357	91044	13
63	63.04	144.691	-38.2797	2015-01-11 11:49:11	0.717869	12295	13
63	63.05	144.697	-38.2942	2015-01-12 07:45:07	2.00043	30952	13
63	63.06	144.682	-38.2877	2015-01-12 16:45:01	1.92663	51321	13
63	63.09	144.675	-38.2896	2015-01-13 19:32:09	2.55328	46169	13
63	63.11	144.693	-38.2836	2015-01-14 12:43:35	0.92003	26594	13
63	63.12	144.7	-38.2673	2015-01-14 20:29:58	1.00694	43520	13
63	63.13	144.695	-38.281	2015-01-15 09:07:00	0.587604	108181	13
63	63.14	144.697	-38.2826	2015-01-16 15:44:45	0.719547	68352	13
63	63.15	144.693	-38.2845	2015-01-17 17:05:22	1.02098	63106	13
63	63.16	144.695	-38.2826	2015-01-18 20:18:35	0.747722	127069	13
64	64.01	144.695	-38.283	2015-01-09 14:49:21	0.803761	14281	11
64	64.02	144.693	-38.2896	2015-01-10 07:34:02	1.54114	47206	11
64	64.03	144.694	-38.2913	2015-01-11 05:54:01	1.70973	114698	11
64	64.05	144.686	-38.2863	2015-01-12 17:56:45	1.53552	88263	11
64	64.06	144.7	-38.2863	2015-01-13 19:39:22	1.11529	142678	11
64	64.07	144.69	-38.2823	2015-01-15 11:28:31	0.973457	74698	11
64	64.08	144.694	-38.2902	2015-01-16 08:30:48	1.59594	93393	11
64	64.09	144.696	-38.2877	2015-01-17 10:48:09	1.28341	79485	11
64	64.1	144.699	-38.2853	2015-01-18 09:09:35	1.00768	88399	11
64	64.11	144.696	-38.2831	2015-01-19 09:56:05	0.771195	94950	11
64	64.12	144.695	-38.2893	2015-01-20 13:01:14	1.48281	77912	11
65	65.01	144.693	-38.2828	2015-01-09 17:40:13	0.849938	70134	7
65	65.02	144.694	-38.2809	2015-01-10 17:29:35	0.630895	99567	7
65	65.03	144.684	-38.2937	2015-01-12 11:13:41	2.29987	30230	7
65	65.04	144.696	-38.282	2015-01-12 20:11:11	0.657257	77621	7
65	65.05	144.689	-38.284	2015-01-14 05:58:44	1.18819	375002	7
65	65.06	144.691	-38.2807	2015-01-18 14:25:59	0.794745	22014	7
65	65.07	144.693	-38.2815	2015-01-19 05:40:05	0.756042	202386	7
66	66.01	144.682	-38.2847	2015-01-10 05:50:39	1.6812	41851	11
66	66.02	144.686	-38.2824	2015-01-11 15:00:14	1.25038	23289	11
66	66.04	144.684	-38.2839	2015-01-12 18:39:45	1.52974	46482	11
66	66.05	144.682	-38.276	2015-01-13 19:47:23	1.45493	5891	11
66	66.06	144.688	-38.2789	2015-01-14 12:32:25	0.905218	22154	11
66	66.07	144.682	-38.277	2015-01-14 19:02:49	1.42698	48381	11
66	66.08	144.688	-38.2832	2015-01-15 15:02:40	1.19535	68924	11
66	66.09	144.687	-38.2872	2015-01-16 16:26:02	1.57311	159431	11
66	66.1	144.694	-38.2854	2015-01-18 13:31:15	1.08634	86217	11
66	66.11	144.687	-38.2779	2015-01-19 14:48:57	1.04578	66471	11
66	66.13	144.676	-38.2868	2015-01-21 05:53:28	2.31044	9253	11
67	67.01	144.695	-38.2847	2015-01-10 12:35:02	0.976981	74141	11
67	67.02	144.688	-38.2812	2015-01-11 11:51:55	1.08425	25378	11
67	67.03	144.681	-38.2972	2015-01-13 08:55:46	2.77707	79875	11
67	67.04	144.695	-38.2882	2015-01-15 06:02:41	1.35799	11599	11
67	67.06	144.68	-38.2822	2015-01-15 21:55:10	1.76784	30739	11
67	67.07	144.692	-38.2883	2015-01-16 18:56:06	1.44426	42003	11
67	67.08	144.702	-38.2831	2015-01-17 10:45:46	0.821355	173131	11
67	67.09	144.685	-38.2799	2015-01-19 19:08:26	1.18959	43875	11
67	67.1	144.681	-38.2922	2015-01-20 16:53:16	2.32858	50253	11
67	67.12	144.691	-38.2833	2015-01-21 11:36:23	1.02084	28699	11
67	67.13	144.689	-38.2766	2015-01-21 22:18:07	0.848559	31620	11
68	68.01	144.696	-38.2819	2015-01-09 16:35:38	0.650587	135980	3
68	68.03	144.689	-38.2837	2015-01-11 13:32:35	1.1615	101988	3
68	68.04	144.688	-38.2919	2015-01-13 05:51:15	1.94586	785702	3
69	69.01	144.702	-38.29	2015-01-09 16:17:26	1.55529	86463	6
69	69.02	144.697	-38.2842	2015-01-11 00:39:57	0.895816	53325	6
69	69.03	144.705	-38.2789	2015-01-11 17:08:54	0.682784	82475	6
69	69.04	144.691	-38.2872	2015-01-13 09:50:30	1.38085	91440	6
69	69.05	144.697	-38.2825	2015-01-14 19:52:34	0.701792	54562	6
69	69.06	144.695	-38.2811	2015-01-15 13:36:50	0.622746	602889	6
70	70.01	144.704	-38.2675	2015-01-09 12:14:21	1.10779	8801	13
70	70.02	144.696	-38.2875	2015-01-09 15:00:17	1.26627	66981	13
70	70.03	144.689	-38.2819	2015-01-10 19:03:08	1.01472	44467	13
70	70.04	144.701	-38.2718	2015-01-11 10:44:53	0.558931	30304	13
70	70.05	144.684	-38.2824	2015-01-11 20:29:43	1.43705	81176	13
70	70.06	144.694	-38.2856	2015-01-13 05:45:56	1.10593	100686	13
70	70.07	144.695	-38.2799	2015-01-14 12:39:54	0.51105	101748	13
70	70.08	144.69	-38.2886	2015-01-16 05:35:34	1.55382	52313	13
70	70.1	144.702	-38.2699	2015-01-17 06:00:13	0.787944	27781	13
70	70.11	144.718	-38.2653	2015-01-17 19:18:48	2.12155	55763	13
70	70.12	144.706	-38.2834	2015-01-18 15:03:41	1.03693	70662	13
70	70.13	144.692	-38.2788	2015-01-19 14:37:40	0.588694	145198	13
70	70.14	144.674	-38.2856	2015-01-21 10:48:08	2.32628	70812	13
71	71.01	144.694	-38.2847	2015-01-10 05:58:12	0.994951	28784	13
71	71.02	144.694	-38.2899	2015-01-11 05:29:18	1.56484	39979	13
71	71.03	144.693	-38.2784	2015-01-11 17:36:09	0.510289	4804	13
71	71.04	144.705	-38.2835	2015-01-12 14:42:41	1.00996	11764	13
71	71.05	144.698	-38.2906	2015-01-12 18:15:23	1.5872	91759	13
71	71.06	144.718	-38.2874	2015-01-14 10:05:28	2.11079	188564	13
71	71.07	144.697	-38.2921	2015-01-17 08:16:38	1.75614	32656	13
71	71.08	144.707	-38.2909	2015-01-17 17:31:05	1.79839	90345	13
71	71.09	144.701	-38.2852	2015-01-18 19:01:14	1.01885	5421	13
71	71.1	144.691	-38.2874	2015-01-19 05:50:01	1.4018	53087	13
71	71.11	144.708	-38.2903	2015-01-20 11:29:06	1.77361	13424	13
71	71.12	144.691	-38.2939	2015-01-20 15:27:35	2.06938	88107	13
71	71.13	144.686	-38.2883	2015-01-22 05:54:10	1.69347	23986	13
72	72.01	144.698	-38.2838	2015-01-09 11:13:02	0.835592	14723	11
72	72.02	144.687	-38.2885	2015-01-09 17:04:28	1.65726	160812	11
72	72.04	144.701	-38.2815	2015-01-11 20:59:24	0.622744	69798	11
72	72.05	144.691	-38.2892	2015-01-12 17:02:49	1.58394	90331	11
72	72.06	144.692	-38.2885	2015-01-13 18:20:59	1.46737	135953	11
72	72.07	144.694	-38.2798	2015-01-15 12:12:12	0.559568	114299	11
72	72.08	144.687	-38.2861	2015-01-16 20:20:53	1.47091	73007	11
72	72.09	144.695	-38.2824	2015-01-17 18:31:03	0.755366	58273	11
72	72.1	144.691	-38.2908	2015-01-18 17:02:07	1.72819	53353	11
72	72.11	144.699	-38.2808	2015-01-19 08:10:21	0.501128	83563	11
72	72.12	144.689	-38.2861	2015-01-20 17:15:09	1.37196	164687	11
73	73.01	144.693	-38.2911	2015-01-09 12:22:42	1.70912	13735	10
73	73.02	144.705	-38.2948	2015-01-10 10:52:13	2.13179	74288	10
73	73.03	144.702	-38.2825	2015-01-11 16:43:54	0.762318	57238	10
73	73.04	144.692	-38.2894	2015-01-13 15:43:50	1.55122	3733	10
73	73.05	144.706	-38.291	2015-01-14 09:11:28	1.76971	108527	10
73	73.06	144.694	-38.2837	2015-01-17 10:41:30	0.918652	35789	10
73	73.07	144.707	-38.2843	2015-01-18 11:41:16	1.14509	5304	10
73	73.08	144.706	-38.2733	2015-01-18 13:49:51	0.744935	108574	10
73	73.09	144.678	-38.2775	2015-01-20 16:20:02	1.82082	52625	10
73	73.1	144.703	-38.2732	2015-01-21 11:04:01	0.531296	70352	10
74	74.01	144.699	-38.2875	2015-01-09 12:41:31	1.25262	9514	17
74	74.02	144.704	-38.287	2015-01-09 16:47:56	1.30171	5604	17
74	74.03	144.703	-38.2826	2015-01-10 06:53:31	0.797275	8157	17
74	74.04	144.709	-38.2931	2015-01-10 09:46:30	2.08937	14243	17
74	74.05	144.704	-38.2861	2015-01-10 17:48:07	1.18453	7932	17
74	74.06	144.69	-38.2816	2015-01-11 11:17:39	0.910539	6475	17
74	74.07	144.687	-38.2851	2015-01-11 13:19:59	1.37442	21760	17
74	74.09	144.692	-38.2836	2015-01-12 07:20:57	0.98865	31185	17
74	74.1	144.687	-38.2891	2015-01-12 18:26:43	1.7371	7394	17
74	74.11	144.695	-38.2884	2015-01-13 14:45:55	1.38715	4891	17
74	74.13	144.694	-38.2849	2015-01-14 08:29:50	1.02756	445624	17
74	74.14	144.692	-38.2818	2015-01-19 19:15:26	0.806058	5069	17
74	74.15	144.679	-38.2889	2015-01-20 06:26:00	2.20113	18928	17
74	74.16	144.709	-38.2905	2015-01-20 15:14:34	1.84061	16826	17
74	74.18	144.693	-38.2848	2015-01-21 11:17:32	1.06957	35433	17
74	74.19	144.694	-38.2807	2015-01-22 05:47:35	0.591709	12866	17
74	74.2	144.693	-38.2787	2015-01-22 10:17:18	0.52198	39264	17
75	75.01	144.694	-38.2796	2015-01-09 14:50:19	0.518608	65333	16
75	75.02	144.688	-38.2875	2015-01-10 19:20:49	1.51894	6958	16
75	75.04	144.687	-38.2876	2015-01-11 15:00:29	1.57997	14998	16
75	75.06	144.651	-38.321	2015-01-12 11:20:38	6.4624	19789	16
75	75.08	144.691	-38.2891	2015-01-12 18:35:21	1.5612	6636	16
75	75.09	144.69	-38.2911	2015-01-13 05:47:03	1.79325	53369	16
75	75.1	144.705	-38.2661	2015-01-14 11:21:32	1.27674	23377	16
75	75.11	144.702	-38.2726	2015-01-15 08:25:30	0.529087	12541	16
75	75.12	144.701	-38.2845	2015-01-15 13:16:56	0.935968	28815	16
75	75.14	144.714	-38.2619	2015-01-16 14:45:56	2.0853	11839	16
75	75.16	144.693	-38.2814	2015-01-17 10:54:13	0.73825	36157	16
75	75.17	144.691	-38.287	2015-01-18 05:51:47	1.36061	41127	16
75	75.18	144.711	-38.2711	2015-01-18 19:53:48	1.28155	51858	16
75	75.19	144.694	-38.2817	2015-01-19 11:50:31	0.696082	79858	16
75	75.2	144.69	-38.2887	2015-01-20 16:23:35	1.54844	53002	16
75	75.22	144.694	-38.2861	2015-01-21 17:02:25	1.15777	49873	16
76	76.01	144.69	-38.2917	2015-01-09 20:32:02	1.86408	37234	12
76	76.02	144.69	-38.2849	2015-01-10 08:46:11	1.19856	101011	12
76	76.03	144.703	-38.2847	2015-01-11 16:42:19	1.0116	51195	12
76	76.04	144.694	-38.2809	2015-01-12 10:33:06	0.622886	25361	12
76	76.05	144.686	-38.2839	2015-01-12 17:49:33	1.36608	160789	12
76	76.06	144.707	-38.2506	2015-01-14 14:51:23	2.96157	6653	12
76	76.07	144.697	-38.2808	2015-01-14 19:42:34	0.520677	79779	12
76	76.08	144.694	-38.2845	2015-01-15 20:32:48	1.00145	255612	12
76	76.09	144.692	-38.2814	2015-01-19 05:42:22	0.809858	43877	12
76	76.1	144.694	-38.2819	2015-01-19 18:06:56	0.748345	64195	12
76	76.11	144.678	-38.2889	2015-01-20 15:40:16	2.23827	100377	12
76	76.12	144.683	-38.2837	2015-01-21 20:29:42	1.58936	35619	12
77	77.01	144.702	-38.2803	2015-01-09 17:39:07	0.563704	50957	19
77	77.02	144.679	-38.2833	2015-01-10 16:54:46	1.88246	62427	19
77	77.04	144.693	-38.2831	2015-01-11 17:54:50	0.910011	10844	19
77	77.05	144.704	-38.2888	2015-01-12 13:04:01	1.48851	20553	19
77	77.06	144.704	-38.2864	2015-01-12 19:07:31	1.24416	63516	19
77	77.07	144.698	-38.285	2015-01-13 18:49:13	0.96766	6604	19
77	77.08	144.715	-38.2853	2015-01-14 08:30:41	1.78036	21963	19
77	77.09	144.704	-38.2804	2015-01-15 11:15:14	0.656213	18412	19
77	77.1	144.706	-38.2841	2015-01-15 19:04:32	1.109	6954	19
77	77.11	144.709	-38.2888	2015-01-16 17:24:53	1.69019	11400	19
77	77.13	144.694	-38.2799	2015-01-17 02:08:11	0.532757	64999	19
77	77.14	144.699	-38.2824	2015-01-18 11:38:41	0.677338	32421	19
77	77.16	144.712	-38.2883	2015-01-19 06:19:22	1.7659	9718	19
77	77.17	144.694	-38.2794	2015-01-19 12:50:52	0.515997	28943	19
77	77.18	144.68	-38.2928	2015-01-20 05:37:15	2.42618	6207	19
77	77.19	144.701	-38.2804	2015-01-20 08:23:06	0.511152	14671	19
77	77.2	144.684	-38.2857	2015-01-20 13:58:57	1.62631	90969	19
77	77.21	144.705	-38.2836	2015-01-21 16:24:20	1.01789	14886	19
77	77.23	144.712	-38.285	2015-01-22 06:30:55	1.54202	50395	19
78	78.01	144.686	-38.2862	2015-01-10 09:19:29	1.53524	99291	11
78	78.03	144.692	-38.2893	2015-01-12 09:35:35	1.55434	84262	11
78	78.04	144.672	-38.2717	2015-01-13 13:12:14	2.35875	15095	11
78	78.05	144.678	-38.2781	2015-01-13 17:40:34	1.79999	2877	11
78	78.07	144.711	-38.2793	2015-01-13 22:22:27	1.12688	12306	11
78	78.09	144.704	-38.2739	2015-01-14 06:56:30	0.572398	183936	11
78	78.1	144.69	-38.2901	2015-01-16 11:32:15	1.67813	160643	11
78	78.12	144.692	-38.2826	2015-01-18 16:18:14	0.874798	55651	11
78	78.13	144.696	-38.2829	2015-01-19 18:17:32	0.756474	54019	11
78	78.14	144.684	-38.2932	2015-01-20 16:32:43	2.27339	9056	11
78	78.15	144.687	-38.278	2015-01-20 19:23:30	0.987038	41145	11
79	79.01	144.703	-38.2863	2015-01-09 12:43:45	1.18097	22613	21
79	79.03	144.709	-38.2892	2015-01-10 07:25:39	1.69245	9264	21
79	79.04	144.703	-38.2799	2015-01-10 17:36:51	0.606694	8654	21
79	79.05	144.714	-38.2815	2015-01-11 06:00:45	1.50772	8914	21
79	79.06	144.694	-38.2794	2015-01-11 08:38:02	0.509986	15415	21
79	79.08	144.704	-38.2749	2015-01-12 02:35:48	0.502578	65467	21
79	79.09	144.704	-38.2794	2015-01-13 06:24:35	0.641326	14649	21
79	79.1	144.711	-38.2895	2015-01-14 08:19:32	1.8457	9215	21
79	79.11	144.715	-38.2974	2015-01-15 06:48:29	2.76306	8926	21
79	79.12	144.708	-38.2808	2015-01-15 09:27:53	1.00688	10417	21
79	79.13	144.702	-38.2812	2015-01-15 16:27:39	0.645392	15742	21
79	79.14	144.711	-38.2898	2015-01-16 06:12:16	1.85706	11295	21
79	79.15	144.704	-38.2912	2015-01-16 16:47:57	1.73186	14005	21
79	79.16	144.708	-38.282	2015-01-17 05:55:19	1.03243	14755	21
79	79.17	144.712	-38.2926	2015-01-17 12:40:34	2.15471	18117	21
79	79.18	144.713	-38.2909	2015-01-18 06:14:26	2.07202	139824	21
79	79.19	144.711	-38.2877	2015-01-20 06:09:42	1.67912	9958	21
79	79.2	144.71	-38.2866	2015-01-20 09:18:43	1.54816	35779	21
79	79.21	144.71	-38.281	2015-01-21 06:28:23	1.11955	8413	21
79	79.22	144.704	-38.2747	2015-01-21 11:38:58	0.53756	33417	21
79	79.23	144.706	-38.2859	2015-01-22 06:49:24	1.25437	47528	21
80	80.01	144.706	-38.2847	2015-01-10 13:25:09	1.15744	24122	10
80	80.02	144.703	-38.2836	2015-01-11 11:10:42	0.91286	30072	10
80	80.05	144.709	-38.2888	2015-01-12 15:58:02	1.67965	16415	10
80	80.06	144.71	-38.2795	2015-01-13 03:05:08	1.04942	23011	10
80	80.07	144.688	-38.2923	2015-01-13 19:18:44	1.99614	51490	10
80	80.08	144.696	-38.2819	2015-01-14 20:52:47	0.65889	42197	10
80	80.09	144.692	-38.2868	2015-01-15 20:39:27	1.30471	44828	10
80	80.11	144.709	-38.2892	2015-01-17 10:07:24	1.71064	34882	10
80	80.12	144.702	-38.2833	2015-01-18 11:35:18	0.84197	31495	10
80	80.13	144.699	-38.292	2015-01-21 06:32:49	1.74504	9755	10
81	81.01	144.694	-38.2797	2015-01-11 11:44:59	0.52659	200877	2
81	81.04	144.694	-38.2797	2015-01-15 13:19:09	0.518895	346220	2
82	82.01	144.707	-38.2855	2015-01-09 17:46:25	1.2836	10065	18
82	82.02	144.718	-38.2809	2015-01-10 11:52:54	1.77936	19136	18
82	82.03	144.71	-38.2839	2015-01-11 06:33:50	1.32321	28165	18
82	82.07	144.693	-38.2884	2015-01-12 06:42:51	1.40786	25762	18
82	82.08	144.706	-38.2637	2015-01-13 14:11:58	1.54269	11571	18
82	82.09	144.712	-38.2896	2015-01-14 13:29:59	1.88926	17443	18
82	82.1	144.714	-38.289	2015-01-15 09:02:09	1.96354	10768	18
82	82.11	144.7	-38.2833	2015-01-16 09:15:16	0.796987	12255	18
82	82.14	144.701	-38.2818	2015-01-16 19:18:47	0.64189	3115	18
82	82.15	144.705	-38.2868	2015-01-17 08:05:39	1.28997	9065	18
82	82.16	144.694	-38.2827	2015-01-17 18:52:59	0.807376	6298	18
82	82.18	144.711	-38.2894	2015-01-18 09:02:59	1.81153	3297	18
82	82.19	144.692	-38.2829	2015-01-18 15:41:39	0.911276	17952	18
82	82.2	144.706	-38.2868	2015-01-19 06:50:24	1.36103	7678	18
82	82.21	144.698	-38.2859	2015-01-19 14:16:25	1.07417	17080	18
82	82.22	144.709	-38.2878	2015-01-20 07:20:38	1.59582	28367	18
82	82.24	144.692	-38.2848	2015-01-20 19:20:10	1.09387	47296	18
82	82.25	144.709	-38.2837	2015-01-21 09:07:56	1.26677	82165	18
83	83.01	144.693	-38.2867	2015-01-10 02:08:02	1.24174	136730	7
83	83.02	144.704	-38.2734	2015-01-11 16:15:33	0.587991	72372	7
83	83.03	144.697	-38.285	2015-01-12 13:20:37	0.976742	17821	7
83	83.04	144.688	-38.3017	2015-01-13 16:31:57	2.98123	74696	7
83	83.05	144.695	-38.2849	2015-01-14 15:24:58	0.997485	246272	7
83	83.06	144.688	-38.2868	2015-01-17 12:06:30	1.4682	374922	7
83	83.07	144.722	-38.2732	2015-01-21 23:09:45	2.12404	63628	7
84	84.01	144.694	-38.2827	2015-01-10 15:03:46	0.809245	189209	5
84	84.02	144.687	-38.2758	2015-01-12 23:54:33	1.00373	40418	5
84	84.03	144.677	-38.2786	2015-01-13 17:15:15	1.83806	1496	5
84	84.04	144.7	-38.2856	2015-01-14 17:03:09	1.05396	664206	5
84	84.05	144.681	-38.2968	2015-01-22 11:42:23	2.71899	12766	5
85	85.01	144.678	-38.2837	2015-01-09 13:51:59	1.94741	7392	21
85	85.02	144.694	-38.2798	2015-01-10 05:43:55	0.550916	15599	21
85	85.03	144.692	-38.2798	2015-01-10 15:04:05	0.676074	5469	21
85	85.05	144.675	-38.2877	2015-01-11 12:58:30	2.37163	15244	21
85	85.06	144.683	-38.2821	2015-01-11 19:36:03	1.47786	39493	21
85	85.07	144.682	-38.2806	2015-01-12 14:18:55	1.4881	7095	21
85	85.09	144.688	-38.2806	2015-01-13 05:29:18	1.05009	5480	21
85	85.1	144.687	-38.2821	2015-01-13 14:16:48	1.19221	4577	21
85	85.11	144.69	-38.2803	2015-01-14 07:46:33	0.861512	32213	21
85	85.12	144.693	-38.2785	2015-01-15 01:26:26	0.528358	14749	21
85	85.13	144.686	-38.2828	2015-01-15 05:37:47	1.28324	8735	21
85	85.14	144.687	-38.2808	2015-01-15 08:48:45	1.13796	16069	21
85	85.15	144.692	-38.2802	2015-01-16 05:27:29	0.731987	17516	21
85	85.16	144.682	-38.2827	2015-01-16 16:36:33	1.57717	51660	21
85	85.18	144.682	-38.2841	2015-01-17 11:24:14	1.63113	108500	21
85	85.19	144.686	-38.2805	2015-01-18 20:27:36	1.13708	38453	21
85	85.2	144.676	-38.2839	2015-01-19 12:15:01	2.11024	19925	21
85	85.21	144.678	-38.2832	2015-01-19 20:10:47	1.92596	47237	21
85	85.23	144.686	-38.279	2015-01-20 20:32:53	1.12057	36245	21
85	85.25	144.668	-38.2839	2015-01-21 08:59:19	2.74825	78189	21
85	85.26	144.682	-38.2799	2015-01-22 09:17:30	1.51828	25984	21

## Sheet: Sheet1
ID	Bird identifier
TripID	bird identifier + trip number
long_depart	longitude at departure
lat_depart	latitutde at departure
time_depart	date and time of departure
discol_depart	distance from colony at departure (km)
trip_duration	duration of foraging trip (seconds)
total_trips	total number of trips made by each individual
